# Supplementary material for: Effective Adsorption of Colorants from Sugarcane Juice by Bagasse-Based Biochar-Hydroxyapatite Composite
Source: MDPI journal article supplement (doi:10.3390/foods11142171), 2022-07-21
Supplement: s1 [file s1]

# Effective Adsorption of Colorants from Sugarcane Juice by Bagasse-Based Biochar-Hydroxyapatite Composite

Cheng Wang <sup>1</sup>, Mengying Luo <sup>1</sup>, Caifeng Xie <sup>1,2,3</sup>, Kai Li <sup>1,2,3</sup>, Fangxue Hang <sup>1,2,3,\*</sup>, Changrong Shi <sup>4,5,\*</sup> and William O.S. Doherty <sup>4,5</sup>

<sup>1</sup> College of Light Industry and Food Engineering, Guangxi University, Nanning 530004, China; jonas\_cheng\_w@163.com (C.W.); luomengyinggxu@163.com (M.L.); fcx11@163.com (C.X.); gxlikai@gxu.edu.cn (K.L.)

<sup>2</sup> Provincial and Ministerial Collaborative Innovation Center for Sugar Industry, Nanning 530004, China

<sup>3</sup> Engineering Research Center for Sugar Industry and Comprehensive Utilization, Ministry of Education, Nanning 530004, China

<sup>4</sup> Centre for Agriculture and the Bioeconomy, Faculty of Science, Queensland University of Technology, Brisbane, QLD 4000, Australia; w.doherty@qut.edu.au

<sup>5</sup> School of Mechanical, Medical and Process Engineering, Faculty of Engineering, Queensland University of Technology, Brisbane, QLD 4000, Australia

\* Correspondence: hangfx@163.com (F.H.); c.shi@qut.edu.au (C.S.)

**Table S1.** Related information on the macroporous adsorption resin used in this work.

| Type | Manufacturer                          |
|------|---------------------------------------|
| D101 | Tianjing Guangfu biochemical Co., Ltd |

**Table S2.** Related information on the activated carbons used in this work (all the activated carbons are in powder form).

| Number | Type      | Manufacturer                          |
|--------|-----------|---------------------------------------|
| 1      | Hongsheng | Dongguan Hongsheng Carbon Co., Ltd    |
| 2      | Macklin   | Shanghai Macklin Biochemical Co., Ltd |
| 3      | Sinopharm | Sinopharm Chemical Reagent Co., Ltd   |
| 4      | Guanghua  | Guangdong Guanghua Sci-Tech Co., Ltd  |

**Table S3.** Related information on the ion exchange resins and fiber used in this work.

| Number | Type | Manufacturer                          |
|--------|------|---------------------------------------|
| 1      | A722 | Shanghai Macklin Biochemical Co., Ltd |
| 2      | D201 | Beijing Solarbio Biochemical Co., Ltd |
| 3      | D301 | Beijing Solarbio Biochemical Co., Ltd |
| 4      | IEF  | Luoyang Xianrui Technology Co., Ltd   |
